# Supplementary material for: Pathophysiological Effects of Overactive STIM1 on Murine Muscle Function and Structure
Source: MDPI journal article supplement (doi:10.3390/cells10071730), 2021-07-08
Supplement: s1 [file s1]

## SUPPLEMENTAL MATERIAL

**Supplemental Figure S1. Enrichment of immune-related GO-terms.** (A) Classification of the dysregulated genes in *Stim1*<sup>R304W/+</sup> tibialis anterior into GO terms reveals an important number of groups associated with the immune response (n=4). (B) RNAseq uncovered a total of 3349 differentially expressed genes (DEG) in *Stim1*<sup>R304W/+</sup> tibialis anterior compared with the WT. Following removal of the immune-related GO terms, 2841 DEG remained.

**Supplemental Figure S2. Reduced expression of SERCA1 in *Stim1*<sup>R304W/+</sup> tibialis anterior.** (A-C) Western blots showing the SERCA1, DHPR and RyR1 protein levels in WT and *Stim1*<sup>R304W/+</sup> tibialis anterior (n=6, corresponding to the graph in Fig. 1D and 1F). Ponceau staining served as loading control.

**Supplemental Figure S3. Decrease of mitochondrial markers in *Stim1*<sup>R304W/+</sup> tibialis anterior.** (A-C) Western blots on muscle extracts showing a decrease of PGC1 $\alpha$  protein level (graph in Fig. 2C), and of the mitochondrial electron transport chain proteins ATP5A, UQCRC2, SDHB, and NDUFB8 (n=6). Ponceau staining served as loading control. (D) H<sub>2</sub>O<sub>2</sub> production is slightly reduced in *Stim1*<sup>R304W/+</sup> tibialis anterior muscle fibers. Significant differences are illustrated as \*(p<0.05), \*\*(p<0.01), and \*\*\*(p<0.001).

**Supplemental Figure S4. Increased proportion of apoptotic and regenerating fibers in *Stim1*<sup>R304W/+</sup> tibialis anterior.** Immunofluorescence showing apoptotic fibers on *Stim1*<sup>R304W/+</sup> muscle sections as illustrated by the signal of cleaved caspase-3 (top), and regenerating fibers expressing embryonic myosin (bottom). Wheat germ agglutinin (WGA) outlines the myofibers. Scales correspond to 50  $\mu$ m.

**Supplemental Figure S5. Decreased SERCA1 levels in *StimI*<sup>R304W/+</sup> soleus.** (A-C) Western blots showing the SERCA1, DHPR and RyR1 levels in muscle extracts (n=4-5, graph in Fig. 5B). The cross indicates an incorrectly charged lane removed from the analysis. Ponceau staining serves as loading control.

**Supplemental Figure S6. Decreased mitochondrial markers in *StimI*<sup>R304W/+</sup> soleus.** (A-C) Western blots revealing reduced levels of PGC1 $\alpha$  (graph in Fig. 5C) and of ATP5A, UQCRC2, SDHB, and NDUFB8, representing proteins of the mitochondrial electron transport chain complexes V, III, II, and I in *StimI*<sup>R304W/+</sup> muscle samples compared with WT. Ponceau staining served as loading control, and crosses indicate incorrectly loaded lanes removed from the analysis. (D) Decreased H<sub>2</sub>O<sub>2</sub> production in *StimI*<sup>R304W/+</sup> soleus. Significant differences are illustrated as \*(p<0.05).

**Supplemental Figure S7. Increased proportion of type I muscle fibers, apoptosis, and regeneration in *StimI*<sup>R304W/+</sup> soleus.** (A) Representative muscle cross sections and statistical analysis showing the fiber type pattern and highlighting an increased proportion of type I fibers in *StimI*<sup>R304W/+</sup> soleus compared with the control (n=4-5). Type I fibers appear in red, intermediate type IIa fibers in green, and fast type IIb fibers in blue. The remaining fibers are fast IIx. Significant differences are illustrated as \*\*\*\* (p<0.0001). (B) Apoptotic fibers in *StimI*<sup>R304W/+</sup> soleus staining positive for cleaved caspase-3 (top), and regenerating fibers expressing embryonic myosin (bottom). Wheat germ agglutinin (WGA) outlines the myofibers.

**Supplemental Table S1. List of primers and associated sequences used for qPCR and RT-qPCR.**

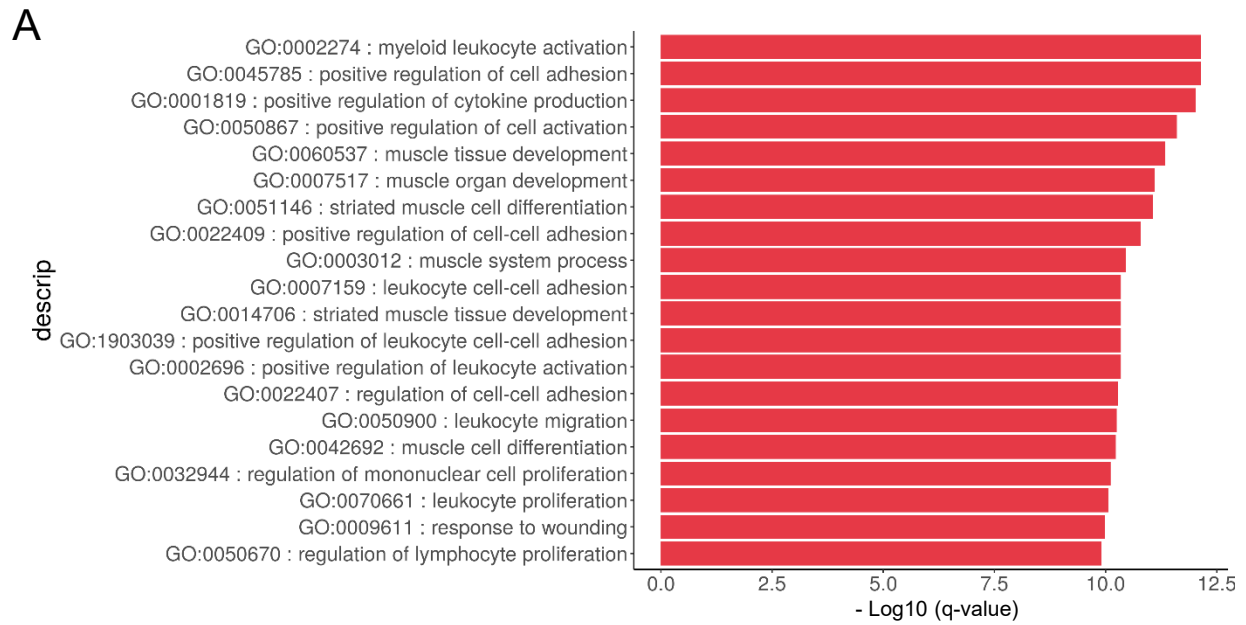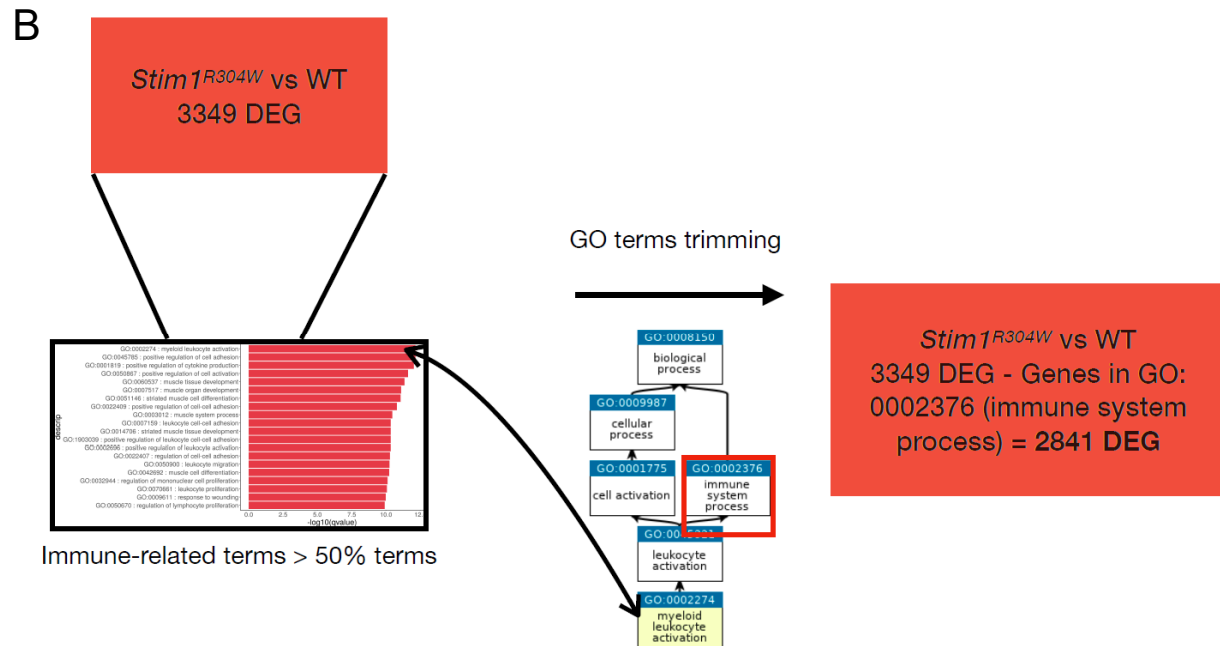

**Supplemental Figure S1**

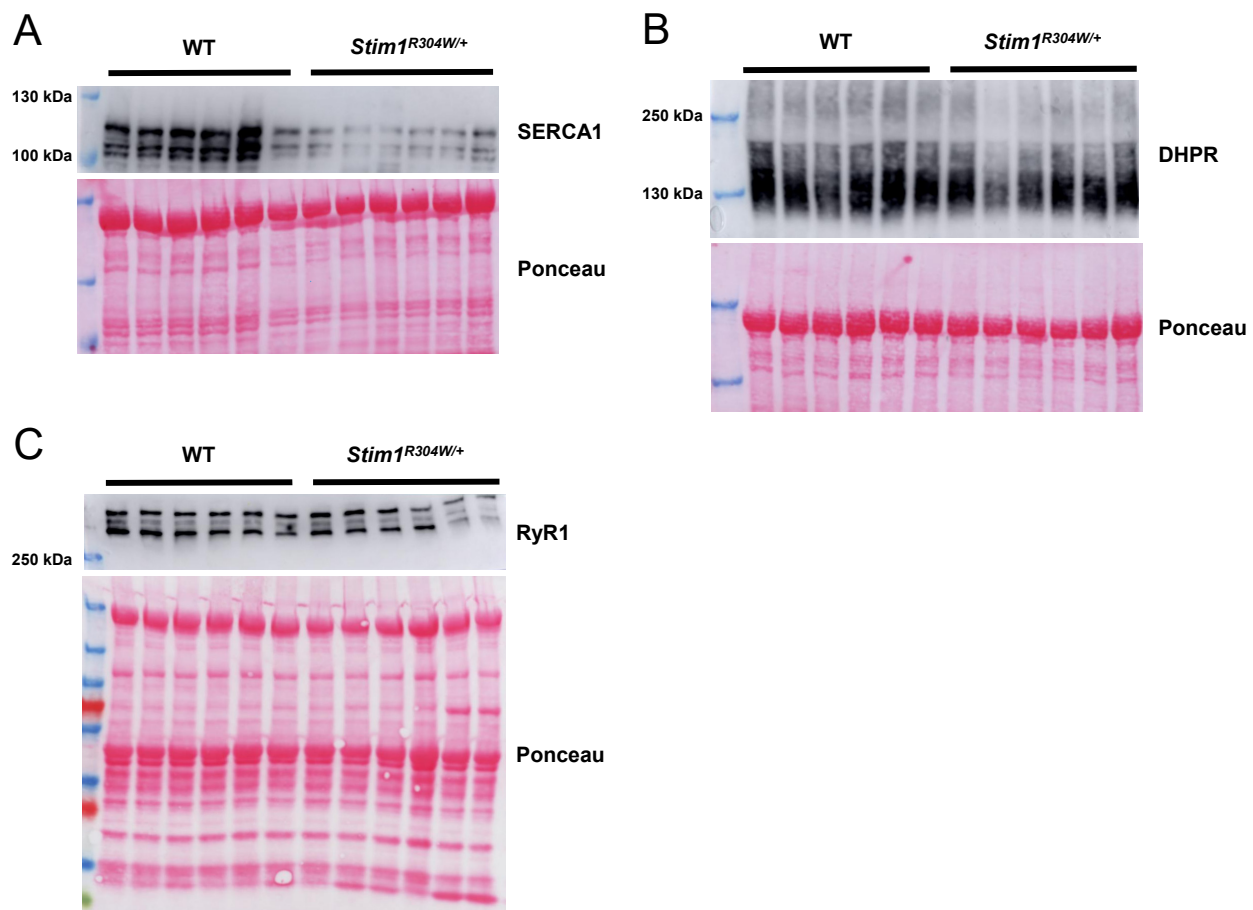

Supplemental Figure S2

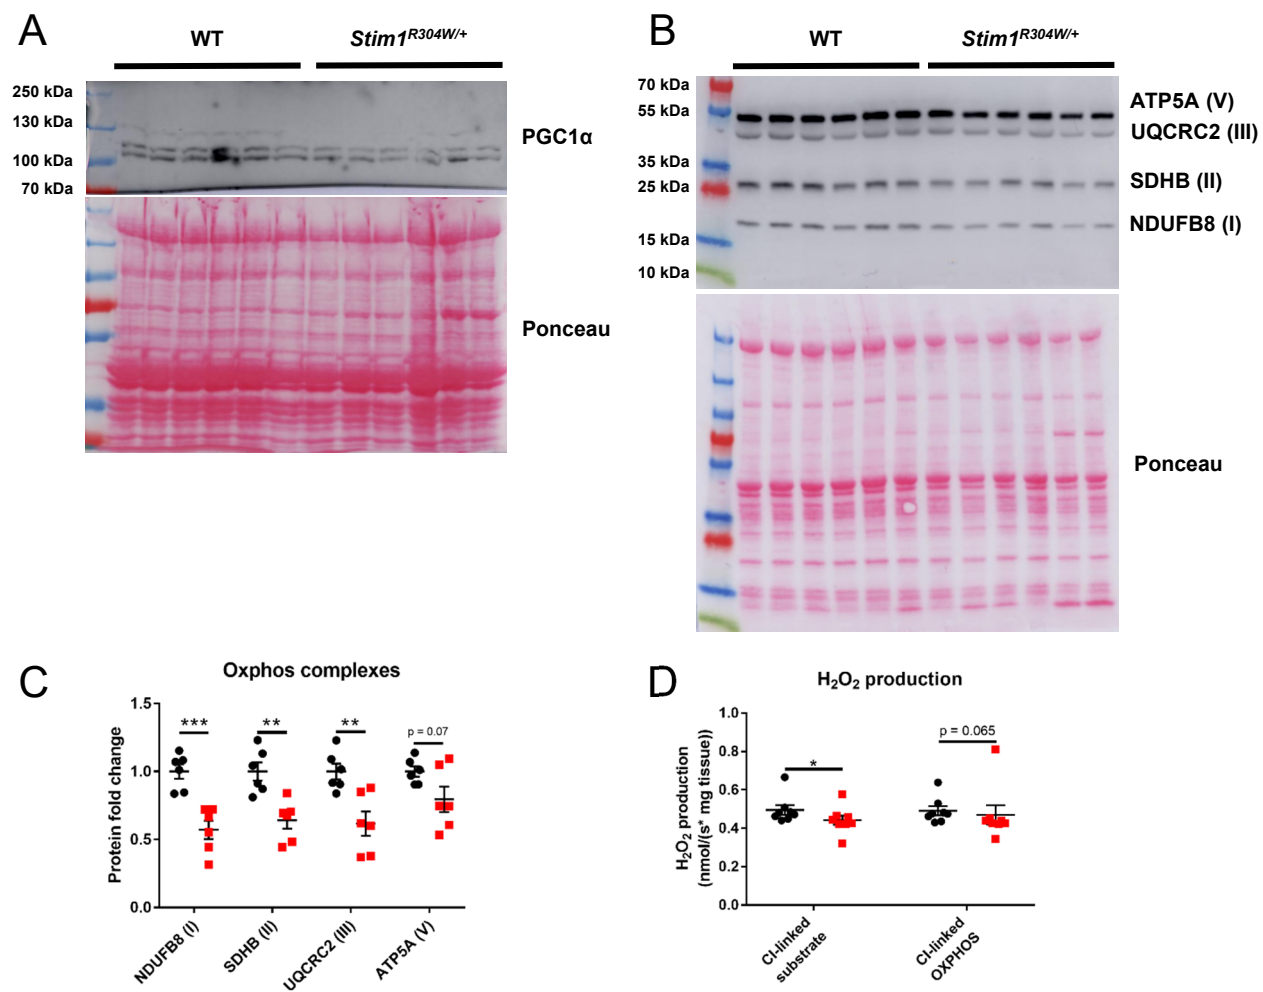

Supplemental Figure S3

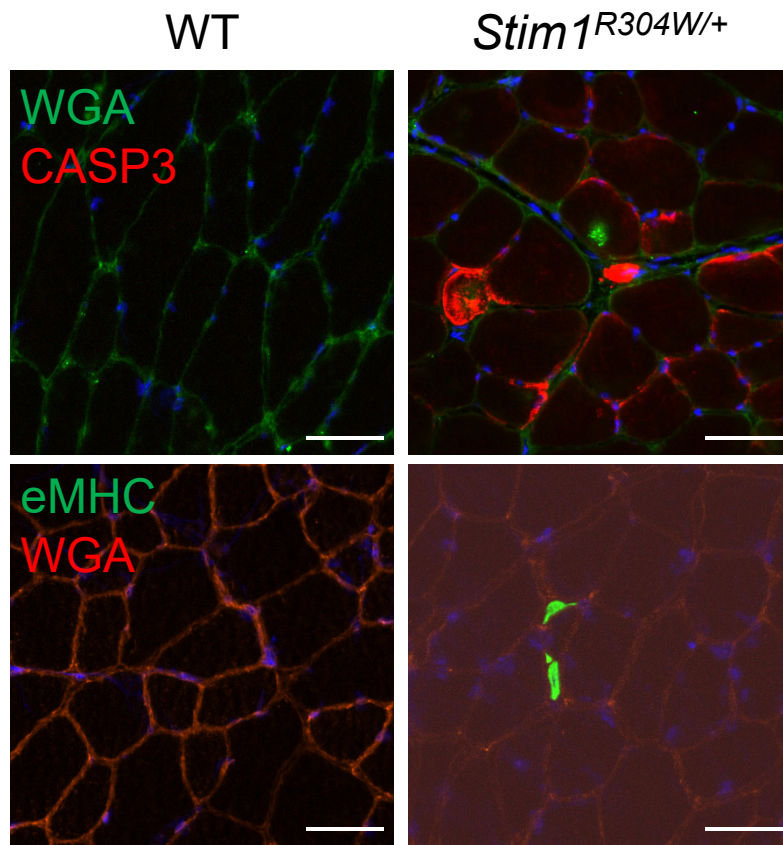

Supplemental Figure S4

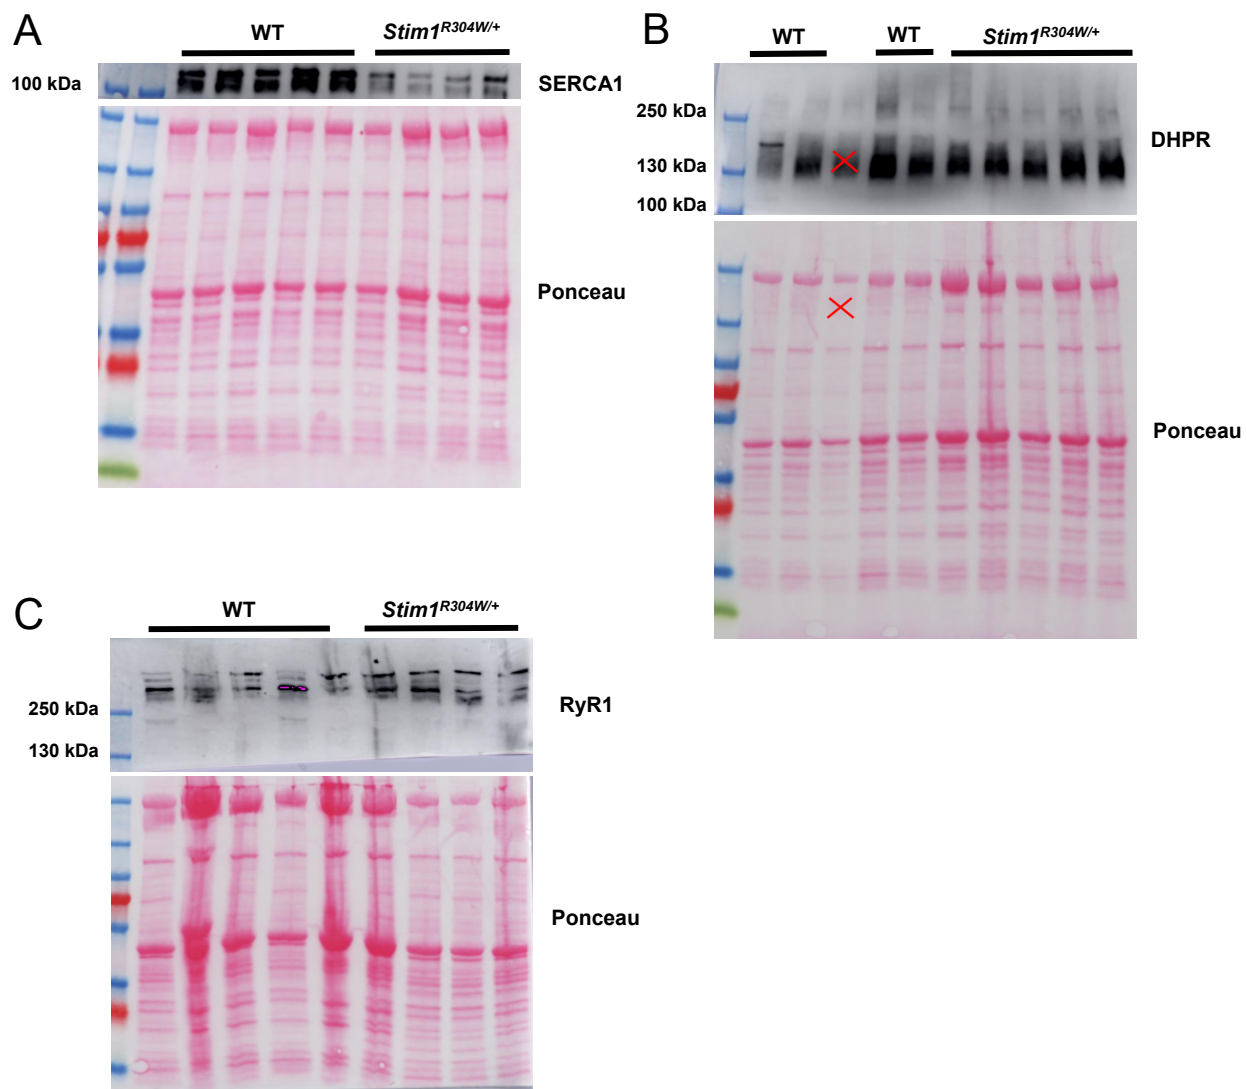

Supplemental Figure S5

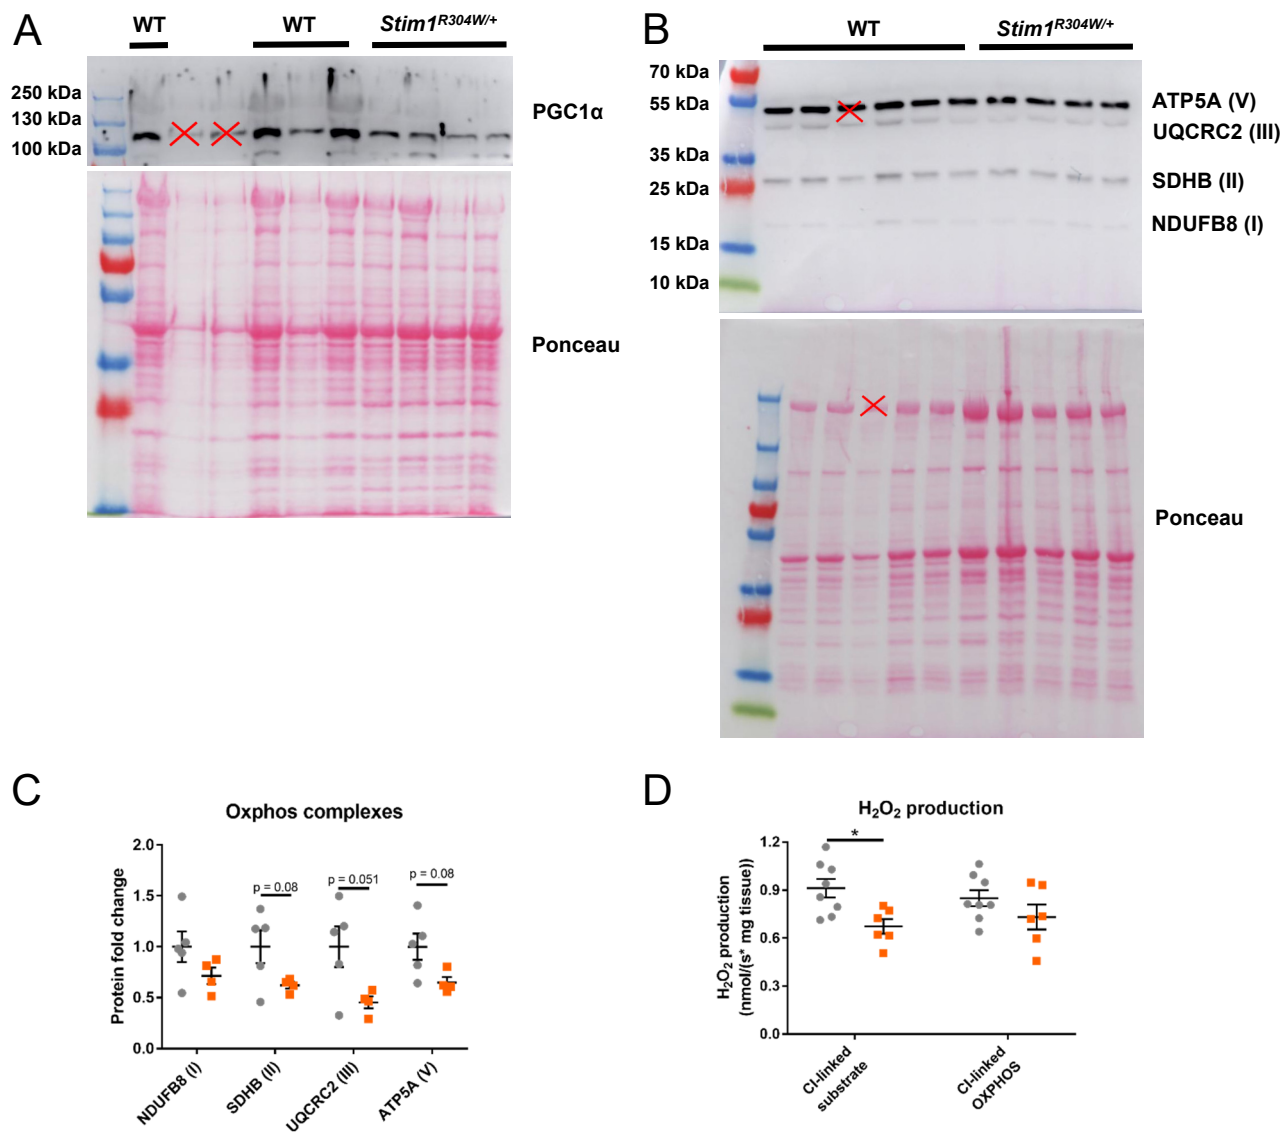

Supplemental Figure S6



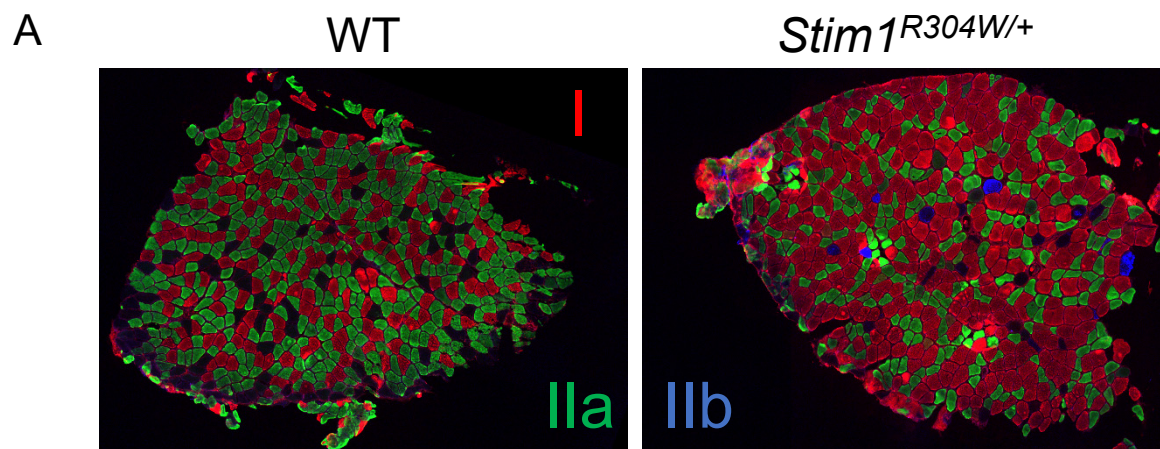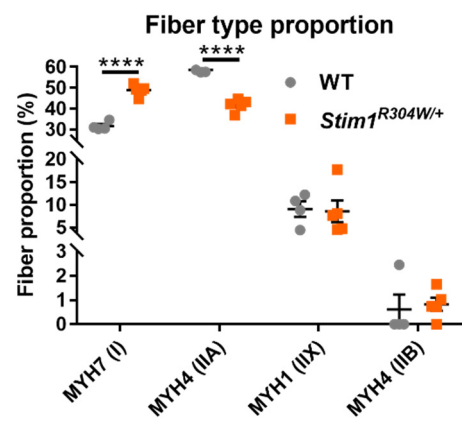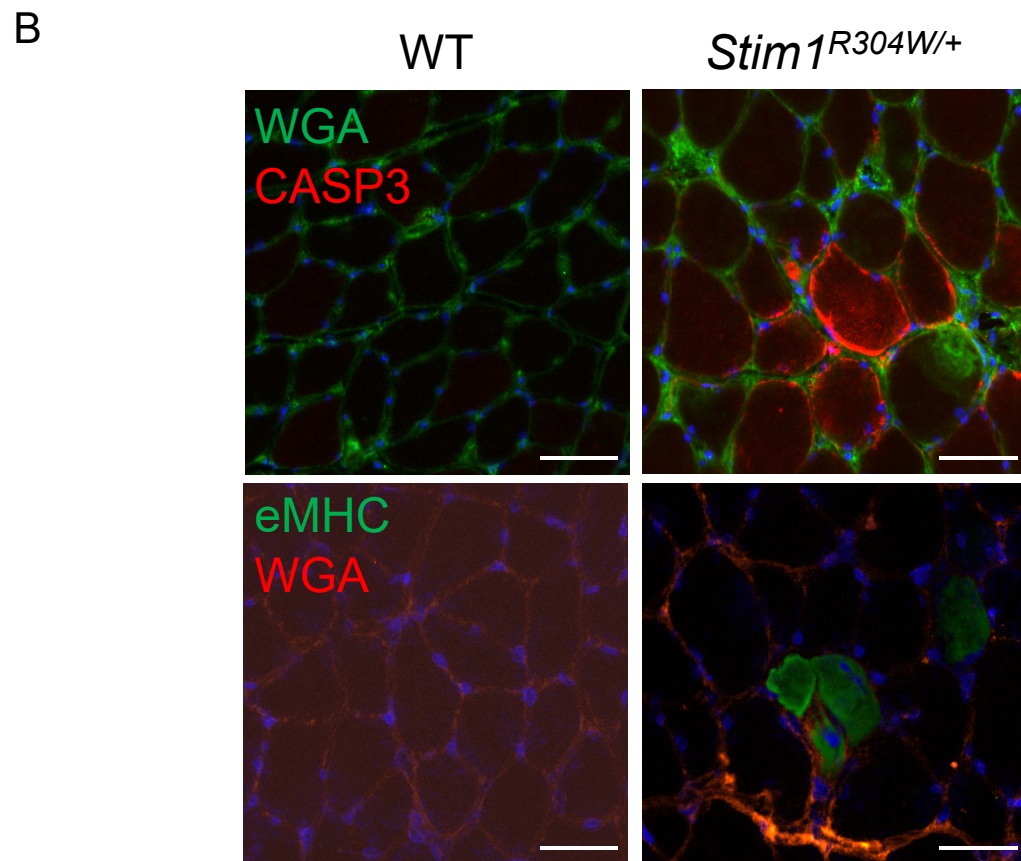

**Supplemental Table S1.**

| Pathway                    | Gene            | Forward primer             | Reverse primer                  |
|----------------------------|-----------------|----------------------------|---------------------------------|
| Ca <sup>2+</sup> extrusion | <i>Atp2b1</i>   | TTATCAACCTCCGGAAGGGGATAAT  | GCTCCTTCAATCCACCCCGTTTCT        |
|                            | <i>Slc8a1</i>   | GTTTGTGCTCTTGGAACCTCGGTG   | GTGACATTGCCTATAGACGCATCTG       |
|                            | <i>Slc8a3</i>   | TTTTGTGGCATTGCGCACCTCTGTG  | GTGACGTTGCCAATGGAAGCATCTG       |
| SR refilling               | <i>Atp2a1</i>   | CCCTCACCACCAACCAGATGTCAGTT | CAGTGATGGAGAACTCGTTCAGTGAG<br>C |
|                            | <i>Sln</i>      | TGTCCTCATCACC GTTCTCC      | TGGAGTATAGCATGGCCCT             |
|                            | <i>Plb</i>      | AGTGCAATACCTCACTCGCT       | TTCTGACGTGCTTGCTGAGG            |
| EC coupling                | <i>Cana1s</i>   | AACCTGGTGCTGGGTGTCCTG      | TCTCTCGGAGCTTTTGAAGGTTT         |
|                            | <i>Ryr1</i>     | CAGTGGACTACCTCCTGCGGC      | GTTTCTCTTCCCTGTTCTCGATG         |
| Mitochondrial biogenesis   | <i>Ppargc1a</i> | GCAGGTGCAACGAACTGAC        | CTTGCTCTTGGTGGAAGCAG            |
|                            | <i>Sirt1</i>    | GGCCGCGGATAGGTCCA          | AACAATCTGCCACAGCGTCA            |
|                            | <i>Nrf1</i>     | ATGTCCGCACAGAAGAGCAA       | TGTACCAACCTGGATGAGCG            |
|                            | <i>Tfam</i>     | ATAGGCACCGTATTGCGTGA       | AGTTTTGCATCTGGGTGTTAGC          |
| mtDNA copy number          | <i>mt16S</i>    | CTAGAAACCCCGAAACCAAA       | CCAGCTATCACCAAGCTCGT            |
|                            | <i>Cox2</i>     | AATTAGCTCCTTAGTCCTCT       | CTTGGTCGGTTTGATGTTAC            |
|                            | <i>Loop</i>     | GCGTTATCGCCTCATACGTT       | GATTGGGTTTTGCGGACTAA            |
| Mitochondrial transport    | <i>Rhot1</i>    | GGCCATGTACCCGCACG          | ATGTGTTTTGGTAGGCCGGT            |
|                            | <i>Trak1</i>    | GTCTCCAGACATCACCCACC       | TATCGAGGACCACGTTGCTG            |
| Mitochondrial dynamics     | <i>Dnm1l</i>    | GAGTTGAAGCAGAAGAATGGGG     | CGCCTACAGGTACTTTGGTCA           |
|                            | <i>Fis1</i>     | GCAACTACCGGCTCAAGGAAT      | GTGAGGCTGCCTTCAGGATT            |
|                            | <i>Opa1</i>     | TGAGGCCCTTCTCTTGTTAGG      | TCTTTGTCTGACACCTTCCTGT          |
|                            | <i>Mfn2</i>     | GCTAGAACTTCTCCTCTGTTCCA    | CTTGACGGTGACGATGGAGT            |
| Unfolded protein response  | <i>Hspa5</i>    | CTATTCCTGCGTCGGTGTGT       | ATTCCAAGTGCCTCCGATGA            |
|                            | <i>Hsp90b1</i>  | CCACTCAAATCGAACACGGC       | AGATTCCGCCTCCTTTCTGC            |
|                            | <i>Xbp1</i>     | AGAAGAGAACCACAACTCCAGC     | ACATAGTCTGAGTGCTGCGG            |
|                            | <i>Ddit3</i>    | CCAGAATAACAGCCGGAACC       | ATCCTCATACCAGGCTTCCA            |
| Muscle regeneration        | <i>Myh3</i>     | CTTCACCTCTAGCCGGAATGGT     | AATTGTCAGGAGCCACGAAAAT          |
|                            | <i>Myh8</i>     | CAGGAGCAGGAATGATGCTCTGAG   | AGTTCCTCAAACCTTTCAGCAGCCAA      |
| RT-qPCR control            | <i>Rpl27</i>    | AAGCCGTCATCGTGAAGAACA      | CTTGATCTTGGATCGCTTGGC           |
| qPCR control               | <i>B2M</i>      | ATGGGAAGCCGAACATACTG       | CAGTCTCAGTGGGGGTGAAT            |
